# Supplementary material for: Duodenal perforation due to multiple foreign bodies: consideration for operative approach and surgical repair
Source: HighWire-hosted journal article supplement (doi:10.1136/tsaco-2022-001063), 2022-12-01
Supplement: tsaco-2022-001063supp001_data_supplement.pdf [file tsaco-2022-001063supp001_data_supplement.pdf]

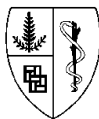

STANFORD  
UNIVERSITY SCHOOL OF MEDICINE

DEPARTMENT OF SURGERY  
DIVISION OF GENERAL SURGERY  
Lisa Marie Knowlton, MD, MPH, FACS  
*Assistant Professor of Surgery*  
*Trauma and Surgical Critical Care*

300 Pasteur Drive, H3591  
Stanford, CA 94305-5641  
Tel 650-725-1097  
Fax 650-725-1216  
Email [drlnk@stanford.edu](mailto:drlnk@stanford.edu)

Dear Dr. Haut and editorial team,

Please find the attached manuscript for your consideration in Challenges in Acute Care Surgery, **“DUODENAL PERFORATION DUE TO MULTIPLE FOREIGN BODIES: CONSIDERATION FOR OPERATIVE APPROACH AND SURGICAL REPAIR”**.

This original manuscript is a case report detailing management of duodenal perforation secondary to multiple foreign body ingestion. In the setting of multiple small duodenal injuries, we performed primary repair. We detail our approach and rationale, as well as the current evidence for duodenal trauma management, in our manuscript. Patient identifying information has been removed. The main manuscript is 727 words exclusive of tables and figures.

Thank you in advance for considering our submission. We feel this represents an important contribution and appreciate your review of this manuscript for publication. This is an original manuscript and has not been submitted for publication elsewhere.

I, Lisa Knowlton, as the corresponding author have reviewed and edited the submission to omit any identifying information. I hereby submit this self-blinded manuscript for consideration in TSACO.

Sincerely,

A handwritten signature in black ink, appearing to be 'L. Knowlton'.

Lisa Marie Knowlton, MD, MPH, FACS, FRCSC  
*Corresponding Author*

300 Pasteur Drive H3691 • Stanford, California 94305  
t: 650-725-1097 • 650-725-1216 email [drlnk@stanford.edu](mailto:drlnk@stanford.edu)
